# Supplementary material for: Serological testing of blood donors to characterise the impact of COVID-19 in Melbourne, Australia, 2020
Source: PLoS One. 2022 Jul 6;17(7):e0265858. doi: 10.1371/journal.pone.0265858 (PMC9258843; doi:10.1371/journal.pone.0265858)
Supplement: S2 File — (XLSX) [file pone.0265858.s003.xlsx]

## Sheet: MAchalek_summarydata
postcode	sampling_group	irsd_decile	sex	agegp	positive	total
3002	High incidence	10	1	5	0	1
3003	High incidence	8	0	1	0	7
3003	High incidence	8	0	2	0	10
3003	High incidence	8	0	3	0	2
3003	High incidence	8	0	4	0	2
3003	High incidence	8	0	5	0	2
3003	High incidence	8	1	1	0	8
3003	High incidence	8	1	2	0	3
3003	High incidence	8	1	3	0	2
3003	High incidence	8	1	4	0	2
3004	High incidence	10	0	1	0	14
3004	High incidence	10	0	1	1	1
3004	High incidence	10	0	2	0	3
3004	High incidence	10	0	3	0	2
3004	High incidence	10	0	4	0	1
3004	High incidence	10	1	1	0	2
3004	High incidence	10	1	1	1	1
3004	High incidence	10	1	2	0	3
3004	High incidence	10	1	3	0	1
3004	High incidence	10	1	4	0	2
3004	High incidence	10	1	5	0	2
3006	Medium incidence	9	0	1	0	14
3006	Medium incidence	9	0	2	0	13
3006	Medium incidence	9	0	3	0	4
3006	Medium incidence	9	0	4	0	2
3006	Medium incidence	9	0	5	0	1
3006	Medium incidence	9	1	1	0	11
3006	Medium incidence	9	1	2	0	15
3006	Medium incidence	9	1	3	0	7
3006	Medium incidence	9	1	4	0	3
3006	Medium incidence	9	1	5	0	3
3011	High incidence	4	0	1	0	11
3011	High incidence	4	0	2	0	9
3011	High incidence	4	0	3	0	4
3011	High incidence	4	0	4	0	1
3011	High incidence	4	0	5	0	3
3011	High incidence	4	1	1	0	12
3011	High incidence	4	1	2	0	15
3011	High incidence	4	1	2	1	1
3011	High incidence	4	1	3	0	7
3011	High incidence	4	1	4	0	3
3011	High incidence	4	1	5	0	3
3011	High incidence	4	1	5	1	1
3012	Medium incidence	4	0	1	0	15
3012	Medium incidence	4	0	1	1	1
3012	Medium incidence	4	0	2	0	12
3012	Medium incidence	4	0	3	0	13
3012	Medium incidence	4	0	4	0	5
3012	Medium incidence	4	0	4	1	2
3012	Medium incidence	4	0	5	0	3
3012	Medium incidence	4	1	1	0	11
3012	Medium incidence	4	1	2	0	20
3012	Medium incidence	4	1	3	0	6
3012	Medium incidence	4	1	4	0	5
3012	Medium incidence	4	1	5	0	3
3013	Medium incidence	9	0	1	0	8
3013	Medium incidence	9	0	2	0	9
3013	Medium incidence	9	0	3	0	11
3013	Medium incidence	9	0	4	0	6
3013	Medium incidence	9	0	5	0	3
3013	Medium incidence	9	1	1	0	6
3013	Medium incidence	9	1	2	0	11
3013	Medium incidence	9	1	3	0	6
3013	High incidence	9	1	4	0	1
3013	Medium incidence	9	1	4	0	3
3013	Medium incidence	9	1	5	0	5
3019	High incidence	1	0	1	0	3
3019	High incidence	1	0	2	0	4
3019	High incidence	1	1	1	0	1
3019	High incidence	1	1	2	0	6
3019	High incidence	1	1	3	0	2
3020	High incidence	1	0	1	0	15
3020	High incidence	1	0	2	0	5
3020	High incidence	1	0	3	0	6
3020	High incidence	1	0	4	0	5
3020	High incidence	1	1	1	0	12
3020	High incidence	1	1	2	0	9
3020	High incidence	1	1	3	0	6
3020	High incidence	1	1	4	0	8
3020	High incidence	1	1	5	0	1
3021	High incidence	1	0	1	0	9
3021	High incidence	1	0	2	0	11
3021	High incidence	1	0	3	0	5
3021	High incidence	1	0	4	0	5
3021	High incidence	1	1	1	0	6
3021	High incidence	1	1	1	1	1
3021	High incidence	1	1	2	0	5
3021	High incidence	1	1	2	1	1
3021	High incidence	1	1	3	0	1
3021	High incidence	1	1	4	0	7
3021	High incidence	1	1	5	0	3
3022	High incidence	1	0	1	0	1
3022	High incidence	1	0	2	0	2
3022	High incidence	1	0	3	0	1
3022	High incidence	1	1	1	0	2
3022	High incidence	1	1	2	0	1
3023	High incidence	4	0	1	0	13
3023	High incidence	4	0	1	1	1
3023	High incidence	4	0	2	0	14
3023	High incidence	4	0	3	0	5
3023	High incidence	4	0	4	0	5
3023	High incidence	4	0	5	0	2
3023	High incidence	4	1	1	0	5
3023	High incidence	4	1	1	1	1
3023	High incidence	4	1	2	0	12
3023	High incidence	4	1	3	0	11
3023	High incidence	4	1	4	0	6
3023	High incidence	4	1	5	0	2
3024	High incidence	4	0	1	0	7
3024	High incidence	4	0	2	0	12
3024	High incidence	4	0	3	0	9
3024	High incidence	4	0	5	0	4
3024	High incidence	4	1	1	0	4
3024	High incidence	4	1	2	0	12
3024	High incidence	4	1	3	0	7
3024	High incidence	4	1	4	0	3
3024	High incidence	4	1	5	0	5
3025	High incidence	2	0	1	0	1
3025	High incidence	2	0	2	0	6
3025	High incidence	2	0	3	0	1
3025	High incidence	2	0	4	0	2
3025	High incidence	2	0	5	0	1
3025	High incidence	2	1	1	0	1
3025	High incidence	2	1	2	0	3
3025	High incidence	2	1	2	1	1
3025	High incidence	2	1	3	0	3
3025	High incidence	2	1	4	0	5
3025	High incidence	2	1	5	0	2
3026	High incidence	1	0	1	0	3
3026	High incidence	1	0	2	0	2
3026	High incidence	1	1	1	0	1
3026	High incidence	1	1	2	0	3
3026	High incidence	1	1	3	0	2
3026	High incidence	1	1	4	0	1
3027	High incidence	9	0	1	0	1
3027	High incidence	9	0	2	0	4
3027	High incidence	9	0	3	0	3
3027	High incidence	9	1	1	0	2
3027	High incidence	9	1	2	0	2
3027	High incidence	9	1	2	1	1
3027	High incidence	9	1	3	0	2
3027	High incidence	9	1	4	0	1
3027	High incidence	9	1	5	0	2
3028	Medium incidence	3	0	1	0	11
3028	Medium incidence	3	0	1	1	1
3028	Medium incidence	3	0	2	0	7
3028	Medium incidence	3	0	3	0	9
3028	Medium incidence	3	0	4	0	8
3028	Medium incidence	3	0	5	0	2
3028	Medium incidence	3	1	1	0	4
3028	Medium incidence	3	1	2	0	9
3028	Medium incidence	3	1	2	1	1
3028	Medium incidence	3	1	3	0	6
3028	Medium incidence	3	1	4	0	8
3028	Medium incidence	3	1	5	0	7
3029	High incidence	5	0	1	0	29
3029	High incidence	5	0	1	1	1
3029	High incidence	5	0	2	0	18
3029	High incidence	5	0	3	0	19
3029	High incidence	5	0	4	0	20
3029	High incidence	5	0	5	0	10
3029	High incidence	5	1	1	0	24
3029	High incidence	5	1	2	0	48
3029	High incidence	5	1	2	1	3
3029	High incidence	5	1	3	0	31
3029	High incidence	5	1	4	0	16
3029	High incidence	5	1	5	0	11
3031	High incidence	3	0	1	0	16
3031	High incidence	3	0	2	0	13
3031	High incidence	3	0	3	0	5
3031	High incidence	3	0	4	0	3
3031	High incidence	3	0	5	0	2
3031	High incidence	3	1	1	0	12
3031	High incidence	3	1	2	0	12
3031	High incidence	3	1	3	0	5
3031	High incidence	3	1	4	0	4
3031	High incidence	3	1	5	0	4
3031	High incidence	3	1	5	1	1
3034	High incidence	5	0	1	0	2
3034	High incidence	5	0	2	0	5
3034	High incidence	5	0	3	0	3
3034	High incidence	5	0	4	0	3
3034	High incidence	5	0	5	0	2
3034	High incidence	5	1	1	0	2
3034	High incidence	5	1	2	0	1
3034	High incidence	5	1	3	0	2
3034	High incidence	5	1	4	0	2
3034	High incidence	5	1	5	0	4
3036	Medium incidence	9	0	1	0	2
3036	Medium incidence	9	0	2	0	2
3036	Medium incidence	9	0	4	0	1
3036	Medium incidence	9	0	5	0	1
3036	Medium incidence	9	1	3	0	1
3036	Medium incidence	9	1	4	0	5
3037	High incidence	5	0	1	0	10
3037	High incidence	5	0	2	0	6
3037	High incidence	5	0	3	0	10
3037	High incidence	5	0	4	0	4
3037	High incidence	5	0	4	1	1
3037	High incidence	5	0	5	0	2
3037	High incidence	5	1	1	0	8
3037	High incidence	5	1	2	0	7
3037	High incidence	5	1	3	0	10
3037	High incidence	5	1	4	0	5
3037	High incidence	5	1	5	0	3
3039	Medium incidence	9	0	1	0	10
3039	Medium incidence	9	0	2	0	3
3039	Medium incidence	9	0	2	1	1
3039	Medium incidence	9	0	3	0	6
3039	Medium incidence	9	0	4	0	6
3039	Medium incidence	9	0	5	0	6
3039	Medium incidence	9	1	1	0	7
3039	Medium incidence	9	1	2	0	3
3039	Medium incidence	9	1	3	0	5
3039	Medium incidence	9	1	4	0	7
3039	Medium incidence	9	1	5	0	3
3042	Medium incidence	7	0	1	0	5
3042	Medium incidence	7	0	2	0	4
3042	Medium incidence	7	0	3	0	6
3042	Medium incidence	7	0	4	0	5
3042	Medium incidence	7	0	5	0	3
3042	Medium incidence	7	1	1	0	1
3042	Medium incidence	7	1	2	0	9
3042	Medium incidence	7	1	3	0	6
3042	Medium incidence	7	1	4	0	10
3042	Medium incidence	7	1	5	0	3
3046	High incidence	3	0	1	0	10
3046	High incidence	3	0	1	1	2
3046	High incidence	3	0	2	0	8
3046	High incidence	3	0	3	0	8
3046	High incidence	3	0	4	0	9
3046	High incidence	3	0	4	1	1
3046	High incidence	3	0	5	0	5
3046	High incidence	3	1	1	0	11
3046	High incidence	3	1	2	0	10
3046	High incidence	3	1	3	0	14
3046	High incidence	3	1	4	0	7
3046	High incidence	3	1	5	0	3
3047	High incidence	1	0	1	0	5
3047	High incidence	1	0	2	0	2
3047	High incidence	1	0	3	0	2
3047	High incidence	1	0	5	0	2
3047	High incidence	1	1	2	0	3
3047	High incidence	1	1	3	0	2
3047	High incidence	1	1	4	0	1
3047	High incidence	1	1	5	0	1
3048	Medium incidence	1	0	1	0	2
3048	Medium incidence	1	0	2	0	2
3048	Medium incidence	1	0	3	0	1
3048	Medium incidence	1	0	5	0	1
3048	Medium incidence	1	1	2	0	2
3048	Medium incidence	1	1	3	0	1
3048	Medium incidence	1	1	4	0	1
3048	Medium incidence	1	1	5	0	2
3051	High incidence	3	0	1	0	16
3051	High incidence	3	0	2	0	8
3051	High incidence	3	0	3	0	4
3051	High incidence	3	0	4	0	1
3051	High incidence	3	1	1	0	9
3051	High incidence	3	1	2	0	6
3051	High incidence	3	1	3	0	4
3051	High incidence	3	1	4	0	1
3051	High incidence	3	1	5	0	2
3052	High incidence	8	0	1	0	8
3052	High incidence	8	0	1	1	1
3052	High incidence	8	0	2	0	4
3052	High incidence	8	0	3	0	2
3052	High incidence	8	0	5	0	1
3052	High incidence	8	1	1	0	5
3052	High incidence	8	1	2	0	5
3052	High incidence	8	1	3	0	1
3054	Medium incidence	10	0	1	0	3
3054	Medium incidence	10	0	2	0	3
3054	Medium incidence	10	0	3	0	2
3054	Medium incidence	10	1	1	0	5
3054	Medium incidence	10	1	2	0	5
3054	Medium incidence	10	1	3	0	6
3054	Medium incidence	10	1	5	0	3
3055	Medium incidence	7	0	1	0	15
3055	Medium incidence	7	0	1	1	1
3055	Medium incidence	7	0	2	0	9
3055	Medium incidence	7	0	3	0	5
3055	Medium incidence	7	0	4	0	4
3055	Medium incidence	7	0	5	0	2
3055	Medium incidence	7	1	1	0	4
3055	Medium incidence	7	1	2	0	5
3055	Medium incidence	7	1	3	0	2
3055	Medium incidence	7	1	3	1	1
3055	Medium incidence	7	1	4	0	3
3055	Medium incidence	7	1	5	0	1
3056	Medium incidence	8	0	1	0	25
3056	Medium incidence	8	0	2	0	20
3056	Medium incidence	8	0	3	0	7
3056	Medium incidence	8	0	4	0	5
3056	Medium incidence	8	0	5	0	1
3056	Medium incidence	8	1	1	0	19
3056	Medium incidence	8	1	2	0	19
3056	Medium incidence	8	1	2	1	1
3056	Medium incidence	8	1	3	0	8
3056	Medium incidence	8	1	3	1	1
3056	Medium incidence	8	1	4	0	6
3056	Medium incidence	8	1	5	0	2
3057	Medium incidence	9	0	1	0	9
3057	Medium incidence	9	0	1	1	1
3057	Medium incidence	9	0	2	0	9
3057	Medium incidence	9	0	2	1	1
3057	Medium incidence	9	0	3	0	3
3057	Medium incidence	9	0	4	0	1
3057	Medium incidence	9	0	5	0	2
3057	Medium incidence	9	1	1	0	6
3057	Medium incidence	9	1	2	0	10
3057	Medium incidence	9	1	3	0	2
3057	Medium incidence	9	1	3	1	1
3057	Medium incidence	9	1	5	0	1
3059	Medium incidence	8	0	1	0	6
3059	Medium incidence	8	0	2	0	5
3059	Medium incidence	8	0	3	0	6
3059	Medium incidence	8	0	4	0	2
3059	Medium incidence	8	0	5	0	2
3059	Medium incidence	8	1	1	0	8
3059	Medium incidence	8	1	2	0	5
3059	Medium incidence	8	1	3	0	4
3059	Medium incidence	8	1	4	0	3
3059	Medium incidence	8	1	5	0	1
3060	High incidence	1	0	1	0	2
3060	High incidence	1	0	3	0	1
3060	High incidence	1	0	4	0	2
3060	High incidence	1	1	2	0	1
3060	High incidence	1	1	3	0	1
3060	High incidence	1	1	4	0	2
3060	High incidence	1	1	5	0	3
3061	High incidence	1	0	1	0	2
3061	High incidence	1	1	1	0	1
3061	High incidence	1	1	3	0	1
3064	High incidence	2	0	1	0	22
3064	High incidence	2	0	2	0	21
3064	High incidence	2	0	2	1	1
3064	High incidence	2	0	3	0	18
3064	High incidence	2	0	4	0	8
3064	High incidence	2	0	5	0	4
3064	High incidence	2	1	1	0	12
3064	High incidence	2	1	2	0	15
3064	High incidence	2	1	2	1	1
3064	High incidence	2	1	3	0	24
3064	High incidence	2	1	3	1	1
3064	High incidence	2	1	4	0	13
3064	High incidence	2	1	5	0	7
3065	High incidence	2	0	1	0	11
3065	High incidence	2	0	2	0	13
3065	High incidence	2	0	3	0	3
3065	High incidence	2	0	4	0	2
3065	High incidence	2	0	5	0	3
3065	High incidence	2	1	1	0	7
3065	High incidence	2	1	2	0	6
3065	High incidence	2	1	3	0	3
3065	High incidence	2	1	4	0	3
3066	High incidence	2	0	1	0	5
3066	High incidence	2	0	2	0	12
3066	High incidence	2	0	3	0	3
3066	High incidence	2	1	1	0	1
3066	High incidence	2	1	2	0	8
3066	High incidence	2	1	2	1	2
3066	High incidence	2	1	3	0	2
3066	High incidence	2	1	4	0	2
3068	Medium incidence	9	0	1	0	19
3068	Medium incidence	9	0	2	0	16
3068	Medium incidence	9	0	2	1	1
3068	Medium incidence	9	0	3	0	8
3068	Medium incidence	9	0	3	1	1
3068	Medium incidence	9	0	4	0	3
3068	Medium incidence	9	0	5	0	2
3068	Medium incidence	9	1	1	0	13
3068	Medium incidence	9	1	2	0	10
3068	Medium incidence	9	1	3	0	10
3068	Medium incidence	9	1	4	0	5
3068	Medium incidence	9	1	5	0	3
3071	Low incidence	7	0	1	0	14
3071	Low incidence	7	0	2	0	18
3071	Low incidence	7	0	3	0	5
3071	Low incidence	7	0	4	0	7
3071	Low incidence	7	0	5	0	2
3071	Low incidence	7	1	1	0	12
3071	Low incidence	7	1	2	0	7
3071	Medium incidence	7	1	2	0	1
3071	Low incidence	7	1	3	0	6
3071	Low incidence	7	1	3	1	1
3071	Low incidence	7	1	4	0	4
3071	Low incidence	7	1	5	0	1
3072	Medium incidence	4	0	1	0	18
3072	Medium incidence	4	0	2	0	17
3072	Medium incidence	4	0	3	0	10
3072	Medium incidence	4	0	4	0	7
3072	Medium incidence	4	0	5	0	1
3072	Medium incidence	4	1	1	0	8
3072	Medium incidence	4	1	2	0	19
3072	Medium incidence	4	1	2	1	1
3072	Medium incidence	4	1	3	0	5
3072	Medium incidence	4	1	4	0	10
3072	Medium incidence	4	1	5	0	10
3074	High incidence	1	0	1	0	4
3074	High incidence	1	0	2	0	4
3074	High incidence	1	0	3	0	4
3074	High incidence	1	0	4	0	2
3074	High incidence	1	1	2	0	4
3074	High incidence	1	1	4	0	1
3074	High incidence	1	1	5	0	2
3076	High incidence	4	0	1	0	6
3076	High incidence	4	0	2	0	5
3076	High incidence	4	0	3	0	4
3076	High incidence	4	0	4	0	6
3076	High incidence	4	0	5	0	2
3076	High incidence	4	1	1	0	2
3076	High incidence	4	1	2	0	5
3076	High incidence	4	1	3	0	6
3076	High incidence	4	1	4	0	2
3076	High incidence	4	1	5	0	4
3081	High incidence	1	0	1	0	8
3081	High incidence	1	0	2	0	5
3081	High incidence	1	0	3	0	4
3081	High incidence	1	0	4	0	3
3081	High incidence	1	1	1	0	2
3081	High incidence	1	1	2	0	4
3088	Low incidence	9	0	1	0	14
3088	Low incidence	9	0	2	0	11
3088	Low incidence	9	0	3	0	20
3088	Low incidence	9	0	4	0	13
3088	Low incidence	9	0	5	0	8
3088	Low incidence	9	1	1	0	10
3088	Low incidence	9	1	2	0	12
3088	Low incidence	9	1	3	0	11
3088	Low incidence	9	1	4	0	4
3088	Low incidence	9	1	5	0	8
3090	High incidence	10	0	2	0	2
3090	High incidence	10	0	5	0	1
3090	High incidence	10	1	4	0	2
3090	High incidence	10	1	5	0	1
3093	Medium incidence	10	0	2	0	4
3093	Medium incidence	10	0	3	0	1
3093	Medium incidence	10	0	4	0	4
3093	Medium incidence	10	1	1	0	4
3093	Medium incidence	10	1	2	0	2
3093	Medium incidence	10	1	3	0	5
3093	Medium incidence	10	1	4	0	2
3093	Medium incidence	10	1	5	0	3
3103	Low incidence	9	0	1	0	5
3103	Low incidence	9	0	4	0	5
3103	Low incidence	9	0	5	0	3
3103	Low incidence	9	1	1	0	10
3103	Low incidence	9	1	2	0	2
3103	Low incidence	9	1	3	0	1
3103	Low incidence	9	1	4	0	3
3103	Low incidence	9	1	5	0	5
3105	Low incidence	8	0	1	0	2
3105	Low incidence	8	0	2	0	3
3105	Low incidence	8	0	3	0	3
3105	Low incidence	8	0	4	0	4
3105	Low incidence	8	0	5	0	1
3105	Low incidence	8	1	1	0	1
3105	Low incidence	8	1	2	0	4
3105	Low incidence	8	1	3	0	2
3105	Low incidence	8	1	4	0	1
3105	Low incidence	8	1	5	0	1
3106	Low incidence	10	0	1	0	5
3106	Low incidence	10	0	2	0	3
3106	Low incidence	10	0	3	0	3
3106	Low incidence	10	0	4	0	2
3106	Low incidence	10	1	1	0	3
3106	Low incidence	10	1	2	0	1
3106	Low incidence	10	1	3	0	4
3106	Low incidence	10	1	4	0	3
3106	Low incidence	10	1	5	0	2
3109	Low incidence	8	1	3	0	1
3115	Low incidence	10	0	1	0	3
3115	Low incidence	10	0	2	0	3
3115	Low incidence	10	0	4	0	4
3115	Low incidence	10	0	5	0	2
3115	Low incidence	10	1	1	0	1
3115	Low incidence	10	1	4	0	2
3115	Low incidence	10	1	5	0	3
3116	Low incidence	8	0	1	0	2
3116	Low incidence	8	0	2	0	4
3116	Low incidence	8	0	3	0	1
3116	Low incidence	8	0	4	0	2
3116	Low incidence	8	0	5	0	3
3116	Low incidence	8	1	1	0	3
3116	Low incidence	8	1	2	0	2
3116	Low incidence	8	1	3	0	3
3116	Low incidence	8	1	4	0	2
3116	Low incidence	8	1	5	0	2
3121	Medium incidence	7	0	1	0	1
3122	High incidence	10	0	1	0	1
3125	Low incidence	6	0	1	0	4
3125	Low incidence	6	0	2	0	1
3125	Low incidence	6	0	3	0	1
3125	Low incidence	6	0	4	0	3
3125	Low incidence	6	0	5	0	1
3125	Low incidence	6	1	1	0	6
3125	Low incidence	6	1	2	0	4
3125	Low incidence	6	1	3	0	2
3125	Low incidence	6	1	4	0	4
3125	Low incidence	6	1	4	1	1
3126	Low incidence	10	0	1	0	1
3126	Low incidence	10	0	2	0	2
3126	Low incidence	10	0	3	0	3
3126	Low incidence	10	0	4	0	1
3126	Low incidence	10	1	1	0	3
3126	Low incidence	10	1	3	0	2
3126	Low incidence	10	1	4	0	2
3126	Low incidence	10	1	5	0	3
3127	Low incidence	10	0	1	0	7
3127	Low incidence	10	0	2	0	2
3127	Low incidence	10	0	4	0	5
3127	Low incidence	10	0	5	0	2
3127	Low incidence	10	1	1	0	3
3127	Low incidence	10	1	2	0	3
3127	Low incidence	10	1	3	0	2
3127	Low incidence	10	1	4	0	8
3127	Low incidence	10	1	5	0	4
3129	Low incidence	8	0	1	0	7
3129	Low incidence	8	0	2	0	2
3129	Low incidence	8	0	3	0	3
3129	Low incidence	8	0	4	0	1
3129	Low incidence	8	0	5	0	2
3129	Low incidence	8	1	1	0	4
3129	Low incidence	8	1	2	0	3
3129	Low incidence	8	1	3	0	3
3129	Low incidence	8	1	4	0	6
3129	Low incidence	8	1	5	0	5
3131	Low incidence	7	0	1	0	6
3131	Low incidence	7	0	2	0	3
3131	Low incidence	7	0	2	1	1
3131	Low incidence	7	0	3	0	7
3131	Low incidence	7	0	4	0	6
3131	Low incidence	7	0	5	0	5
3131	Low incidence	7	1	1	0	6
3131	Low incidence	7	1	2	0	8
3131	Low incidence	7	1	3	0	10
3131	Low incidence	7	1	4	0	7
3131	Low incidence	7	1	5	0	5
3131	Low incidence	7	1	5	1	1
3133	Low incidence	9	0	1	0	8
3133	Low incidence	9	0	2	0	6
3133	Low incidence	9	0	3	0	8
3133	Low incidence	9	0	4	0	4
3133	Low incidence	9	0	5	0	4
3133	Low incidence	9	1	1	0	10
3133	Low incidence	9	1	2	0	5
3133	Low incidence	9	1	3	0	10
3133	Low incidence	9	1	4	0	12
3133	Low incidence	9	1	5	0	5
3135	Low incidence	8	0	1	0	6
3135	Low incidence	8	0	2	0	5
3135	Low incidence	8	0	3	0	8
3135	Low incidence	8	0	4	0	7
3135	Low incidence	8	0	4	1	1
3135	Low incidence	8	0	5	0	3
3135	Low incidence	8	1	1	0	2
3135	Low incidence	8	1	2	0	6
3135	Low incidence	8	1	3	0	5
3135	Low incidence	8	1	4	0	9
3135	Low incidence	8	1	5	0	7
3142	Low incidence	10	0	1	0	9
3142	Low incidence	10	0	2	0	5
3142	Low incidence	10	0	3	0	2
3142	Low incidence	10	0	5	0	3
3142	Low incidence	10	1	1	0	4
3142	Low incidence	10	1	2	0	3
3142	Low incidence	10	1	3	0	3
3142	Low incidence	10	1	4	0	3
3142	Low incidence	10	1	5	0	1
3143	Medium incidence	10	0	1	0	11
3143	Medium incidence	10	0	2	0	3
3143	Medium incidence	10	0	4	0	1
3143	Medium incidence	10	0	5	0	2
3143	Medium incidence	10	1	1	0	5
3143	Medium incidence	10	1	2	0	9
3143	Medium incidence	10	1	3	0	3
3143	Medium incidence	10	1	4	0	1
3143	Medium incidence	10	1	5	0	2
3143	Medium incidence	10	1	5	1	1
3146	Low incidence	10	0	1	0	16
3146	Low incidence	10	0	2	0	8
3146	Low incidence	10	0	3	0	6
3146	Low incidence	10	0	4	0	6
3146	Low incidence	10	0	5	0	5
3146	Low incidence	10	1	1	0	15
3146	Low incidence	10	1	2	0	12
3146	Low incidence	10	1	3	0	5
3146	Low incidence	10	1	4	0	14
3146	Low incidence	10	1	5	0	6
3146	Low incidence	10	1	5	1	1
3153	Low incidence	5	0	1	0	5
3153	Low incidence	5	0	2	0	4
3153	Low incidence	5	0	3	0	4
3153	Low incidence	5	0	4	0	3
3153	Low incidence	5	0	5	0	7
3153	Low incidence	5	1	1	0	6
3153	Low incidence	5	1	2	0	9
3153	Low incidence	5	1	3	0	4
3153	Low incidence	5	1	4	0	9
3153	Low incidence	5	1	5	0	6
3154	Low incidence	8	0	1	0	2
3154	Low incidence	8	0	2	0	1
3154	Low incidence	8	0	4	0	2
3154	Low incidence	8	0	5	0	1
3154	Low incidence	8	1	1	0	3
3154	Low incidence	8	1	2	0	1
3154	Low incidence	8	1	3	0	2
3154	Low incidence	8	1	4	0	4
3154	Low incidence	8	1	5	0	2
3161	Low incidence	10	0	1	0	11
3161	Low incidence	10	0	2	0	8
3161	Low incidence	10	0	3	0	7
3161	Low incidence	10	0	4	0	3
3161	Low incidence	10	0	5	0	1
3161	Low incidence	10	1	1	0	10
3161	Low incidence	10	1	2	0	10
3161	Low incidence	10	1	3	0	6
3161	Low incidence	10	1	4	0	7
3161	Low incidence	10	1	4	1	1
3161	Low incidence	10	1	5	0	8
3161	Low incidence	10	1	5	1	1
3162	Low incidence	10	0	1	0	8
3162	Low incidence	10	0	2	0	10
3162	Low incidence	10	0	3	0	8
3162	Low incidence	10	0	4	0	2
3162	Low incidence	10	1	1	0	8
3162	Low incidence	10	1	2	0	10
3162	Low incidence	10	1	3	0	4
3162	Low incidence	10	1	4	0	9
3162	Low incidence	10	1	5	0	2
3162	Low incidence	10	1	5	1	1
3165	Low incidence	9	1	1	0	1
3167	Low incidence	6	0	1	0	4
3167	Low incidence	6	0	2	0	3
3167	Low incidence	6	0	3	0	1
3167	Low incidence	6	0	4	0	6
3167	Low incidence	6	0	5	0	2
3167	Low incidence	6	1	1	0	1
3167	Low incidence	6	1	2	0	2
3167	Low incidence	6	1	3	0	1
3167	Low incidence	6	1	4	0	1
3167	Low incidence	6	1	5	0	3
3173	Low incidence	4	0	1	0	11
3173	Low incidence	4	0	2	0	5
3173	Low incidence	4	0	3	0	6
3173	Low incidence	4	0	4	0	10
3173	Low incidence	4	0	5	0	2
3173	Low incidence	4	1	1	0	6
3173	Low incidence	4	1	2	0	3
3173	Low incidence	4	1	3	0	3
3173	Low incidence	4	1	4	0	9
3173	Low incidence	4	1	5	0	6
3175	Medium incidence	1	0	1	0	10
3175	Medium incidence	1	0	1	1	1
3175	Medium incidence	1	0	2	0	12
3175	Medium incidence	1	0	3	0	12
3175	Medium incidence	1	0	3	1	1
3175	Medium incidence	1	0	4	0	7
3175	Medium incidence	1	0	5	0	5
3175	Medium incidence	1	1	1	0	20
3175	Medium incidence	1	1	2	0	14
3175	Medium incidence	1	1	3	0	9
3175	Medium incidence	1	1	4	0	8
3175	Medium incidence	1	1	5	0	5
3177	Medium incidence	1	0	1	0	4
3177	Medium incidence	1	0	2	0	1
3177	Medium incidence	1	0	3	0	1
3177	Medium incidence	1	0	4	0	3
3177	Medium incidence	1	0	5	0	2
3177	Medium incidence	1	1	1	1	1
3177	Medium incidence	1	1	2	0	3
3177	Medium incidence	1	1	3	0	4
3177	Medium incidence	1	1	5	0	2
3178	Low incidence	9	0	1	0	5
3178	Low incidence	9	0	2	0	3
3178	Low incidence	9	0	3	0	6
3178	Low incidence	9	0	3	1	1
3178	Low incidence	9	0	4	0	14
3178	Low incidence	9	0	5	0	5
3178	Low incidence	9	1	1	0	11
3178	Low incidence	9	1	1	1	1
3178	Low incidence	9	1	2	0	8
3178	Low incidence	9	1	3	0	11
3178	Low incidence	9	1	3	1	1
3178	Low incidence	9	1	4	0	15
3178	Low incidence	9	1	5	0	8
3181	Medium incidence	9	0	1	0	19
3181	Medium incidence	9	0	1	1	1
3181	Medium incidence	9	0	2	0	20
3181	Medium incidence	9	0	3	0	6
3181	Medium incidence	9	0	4	0	3
3181	Medium incidence	9	0	5	0	3
3181	Medium incidence	9	1	1	0	12
3181	Medium incidence	9	1	2	0	14
3181	Medium incidence	9	1	3	0	3
3181	Medium incidence	9	1	4	0	3
3181	Medium incidence	9	1	5	0	2
3183	Low incidence	9	0	1	0	12
3183	Low incidence	9	0	2	0	23
3183	Low incidence	9	0	3	0	6
3183	Low incidence	9	0	4	0	3
3183	Low incidence	9	0	5	0	3
3183	Low incidence	9	1	1	0	9
3183	Low incidence	9	1	2	0	8
3183	Low incidence	9	1	2	1	1
3183	Low incidence	9	1	3	0	7
3183	Low incidence	9	1	4	0	6
3183	Low incidence	9	1	5	0	1
3184	Low incidence	10	0	1	0	8
3184	Low incidence	10	0	1	1	1
3184	Low incidence	10	0	2	0	7
3184	Low incidence	10	0	3	0	1
3184	Low incidence	10	0	4	0	3
3184	Low incidence	10	0	5	0	4
3184	Low incidence	10	1	1	0	5
3184	Low incidence	10	1	2	0	6
3184	Low incidence	10	1	3	0	2
3184	Low incidence	10	1	4	0	4
3184	Low incidence	10	1	5	0	2
3186	Medium incidence	10	0	1	0	8
3186	Medium incidence	10	0	2	0	3
3186	Medium incidence	10	0	3	0	1
3186	Medium incidence	10	0	4	0	8
3186	Medium incidence	10	0	5	0	5
3186	Medium incidence	10	1	1	0	10
3186	Medium incidence	10	1	2	0	1
3186	Medium incidence	10	1	3	0	6
3186	Medium incidence	10	1	4	0	7
3186	Medium incidence	10	1	5	0	7
3193	Low incidence	10	0	1	0	4
3193	Low incidence	10	0	2	0	1
3193	Low incidence	10	0	3	0	4
3193	Low incidence	10	0	4	0	4
3193	Low incidence	10	0	5	0	4
3193	Low incidence	10	1	1	0	2
3193	Low incidence	10	1	2	0	3
3193	Low incidence	10	1	3	0	1
3193	Low incidence	10	1	4	0	5
3193	Low incidence	10	1	5	0	6
3197	Low incidence	8	0	1	0	2
3197	Low incidence	8	0	2	0	3
3197	Low incidence	8	0	4	0	1
3197	Low incidence	8	0	5	0	2
3197	Low incidence	8	1	1	0	1
3197	Low incidence	8	1	2	0	2
3197	Low incidence	8	1	3	0	6
3197	Low incidence	8	1	4	0	4
3197	Low incidence	8	1	5	0	4
3198	Low incidence	4	0	1	0	8
3198	Low incidence	4	0	2	0	7
3198	Low incidence	4	0	3	0	7
3198	Low incidence	4	0	4	0	7
3198	Low incidence	4	0	5	0	5
3198	Low incidence	4	1	1	0	2
3198	Low incidence	4	1	2	0	5
3198	Low incidence	4	1	3	0	5
3198	Low incidence	4	1	4	0	8
3198	Low incidence	4	1	5	0	3
3201	Low incidence	4	0	1	0	7
3201	Low incidence	4	0	2	0	9
3201	Low incidence	4	0	3	0	10
3201	Low incidence	4	0	4	0	7
3201	Low incidence	4	0	5	0	5
3201	Low incidence	4	0	5	1	1
3201	Low incidence	4	1	1	0	8
3201	Low incidence	4	1	1	1	1
3201	Low incidence	4	1	2	0	5
3201	Low incidence	4	1	2	1	1
3201	Low incidence	4	1	3	0	4
3201	Low incidence	4	1	4	0	3
3201	Low incidence	4	1	5	1	1
3204	Low incidence	9	0	1	0	15
3204	Low incidence	9	0	1	1	2
3204	Low incidence	9	0	2	0	8
3204	Low incidence	9	0	3	0	7
3204	Low incidence	9	0	4	0	7
3204	Low incidence	9	0	5	0	11
3204	Low incidence	9	1	1	0	5
3204	Low incidence	9	1	2	0	8
3204	Low incidence	9	1	3	0	15
3204	Low incidence	9	1	4	0	8
3204	Low incidence	9	1	5	0	14
3205	Low incidence	6	0	1	0	6
3205	Low incidence	6	0	2	0	9
3205	Low incidence	6	0	3	0	10
3205	Low incidence	6	0	4	0	5
3205	Low incidence	6	0	5	0	2
3205	Low incidence	6	1	1	0	6
3205	Low incidence	6	1	2	0	2
3205	Low incidence	6	1	3	0	2
3205	Low incidence	6	1	4	0	4
3205	Low incidence	6	1	5	0	3
3284	High incidence	6	1	1	0	1
3284	High incidence	6	1	2	0	1
3335	Medium incidence	6	0	2	0	1
3335	Medium incidence	6	1	3	0	3
3337	High incidence	2	0	1	0	3
3337	High incidence	2	0	1	1	1
3337	High incidence	2	0	2	0	3
3337	High incidence	2	0	3	0	3
3337	High incidence	2	0	4	0	3
3337	High incidence	2	1	1	0	4
3337	High incidence	2	1	2	0	2
3337	High incidence	2	1	3	0	5
3337	High incidence	2	1	4	0	1
3338	High incidence	2	0	1	0	7
3338	High incidence	2	0	2	0	7
3338	High incidence	2	0	2	1	1
3338	High incidence	2	0	3	0	2
3338	High incidence	2	0	5	0	1
3338	High incidence	2	1	1	0	3
3338	High incidence	2	1	2	0	14
3338	High incidence	2	1	3	0	6
3338	High incidence	2	1	4	0	2
3338	High incidence	2	1	5	0	2
3427	High incidence	5	0	1	0	1
3427	High incidence	5	0	2	0	1
3427	High incidence	5	0	3	0	1
3427	High incidence	5	1	3	0	1
3750	High incidence	6	0	1	0	2
3750	High incidence	6	0	2	0	5
3750	High incidence	6	0	5	0	1
3750	High incidence	6	1	1	0	3
3750	High incidence	6	1	2	0	4
3750	High incidence	6	1	3	0	3
3750	High incidence	6	1	4	0	1
3750	High incidence	6	1	5	0	1
3753	High incidence	7	0	2	0	4
3753	High incidence	7	0	3	0	1
3753	High incidence	7	1	2	0	1
3803	High incidence	2	0	1	0	2
3803	High incidence	2	0	2	0	3
3803	High incidence	2	0	3	0	2
3803	High incidence	2	1	2	0	4
3803	High incidence	2	1	3	0	1
3803	High incidence	2	1	4	0	1
3803	High incidence	2	1	5	0	1
3805	Medium incidence	5	0	1	0	12
3805	Medium incidence	5	0	1	1	1
3805	Medium incidence	5	0	2	0	8
3805	Medium incidence	5	0	3	0	8
3805	Medium incidence	5	0	3	1	1
3805	Medium incidence	5	0	4	0	6
3805	Medium incidence	5	0	5	0	3
3805	Medium incidence	5	1	1	0	4
3805	Medium incidence	5	1	1	1	1
3805	Medium incidence	5	1	2	0	7
3805	Medium incidence	5	1	3	0	16
3805	Medium incidence	5	1	4	0	10
3805	Medium incidence	5	1	4	1	2
3805	Medium incidence	5	1	5	0	9
3807	Low incidence	9	0	2	0	1
3807	Low incidence	9	0	4	0	1
3807	Low incidence	9	1	2	0	1
3807	Low incidence	9	1	3	0	1
3807	Low incidence	9	1	4	0	1
3807	Low incidence	9	1	5	0	1
3809	Medium incidence	9	0	1	0	7
3809	Medium incidence	9	0	2	0	7
3809	Medium incidence	9	0	3	0	2
3809	Medium incidence	9	0	5	0	3
3809	Medium incidence	9	1	1	0	3
3809	Medium incidence	9	1	2	0	6
3809	Medium incidence	9	1	3	0	2
3809	Medium incidence	9	1	5	0	1
3911	Low incidence	7	0	1	0	1
3911	Low incidence	7	0	2	0	1
3911	Low incidence	7	0	5	0	2
3911	Low incidence	7	1	1	0	1
3911	Low incidence	7	1	3	0	1
3911	Low incidence	7	1	4	0	1
3975	Medium incidence	7	0	1	0	4
3975	Medium incidence	7	0	3	0	2
3975	Medium incidence	7	0	4	0	1
3975	Medium incidence	7	0	5	0	1
3975	Medium incidence	7	1	1	0	3
3975	Medium incidence	7	1	2	0	8
3975	Medium incidence	7	1	3	0	3
3975	Medium incidence	7	1	4	0	2
3975	Medium incidence	7	1	5	0	2
3976	Medium incidence	1	0	1	0	8
3976	Medium incidence	1	0	2	0	5
3976	Medium incidence	1	0	3	0	2
3976	Medium incidence	1	0	4	0	2
3976	Medium incidence	1	0	5	0	1
3976	Medium incidence	1	1	1	0	5
3976	Medium incidence	1	1	2	0	6
3976	Medium incidence	1	1	3	0	8
3976	Medium incidence	1	1	4	0	3
3976	Medium incidence	1	1	5	0	3
3977	Medium incidence	5	0	1	0	18
3977	Medium incidence	5	0	1	1	1
3977	Medium incidence	5	0	2	0	18
3977	Medium incidence	5	0	3	0	15
3977	Medium incidence	5	0	4	0	12
3977	Medium incidence	5	0	4	1	1
3977	Medium incidence	5	0	5	0	8
3977	Medium incidence	5	1	1	0	8
3977	Medium incidence	5	1	2	0	30
3977	Medium incidence	5	1	3	0	23
3977	Medium incidence	5	1	4	0	13
3977	Medium incidence	5	1	5	0	7
3977	Medium incidence	5	1	5	1	1
3978	High incidence	8	0	1	0	9
3978	High incidence	8	0	2	0	9
3978	High incidence	8	0	3	0	4
3978	High incidence	8	0	4	0	1
3978	High incidence	8	0	5	0	1
3978	High incidence	8	1	1	0	7
3978	High incidence	8	1	2	0	14
3978	High incidence	8	1	3	0	4
3978	High incidence	8	1	4	0	3
3978	High incidence	8	1	4	1	1
3978	High incidence	8	1	5	0	2
			470

## Sheet: labels
postcode	residential postcode
sampling_group	Sampling group
irsd_decile	Index of relative socioeconomic disadvantage ranking within Victoria (1 "areas of highest dissadvantage" through 10 "areas of lowest dissadvantage")
sex	sex (0 "Female" 1 "Male")
agegp	age group (1 "20-29yo") (2 "30-39yo") (3 "40-49yo") (4 "50-59yo") (5 "60-69yo")
positive	number of positives by wantai
total	total tested
